# Supplementary material for: Novel Cold-Adapted Recombinant Laccase KbLcc1 from Kabatiella bupleuri G3 IBMiP as a Green Catalyst in Biotransformation
Source: MDPI journal article supplement (doi:10.3390/ijms22179593), 2021-09-04
Supplement: s1 [file s1]

# Novel cold-adapted recombinant laccase KbLcc1 from *Kabatiella bupleuri* G3 IBMiP as a green catalyst in biotransformation

Katarzyna M. Wiśniewska, Aleksandra Twarda-Clapa and Aneta M. Białkowska\*

## SUPPLEMENTARY INFORMATION

### Contents:

|                                                                                                                                                                                         |   |
|-----------------------------------------------------------------------------------------------------------------------------------------------------------------------------------------|---|
| <b>Table S1.</b> Optimal temperature for laccase reaction with syringaldazine, guaiacol and sinapic acid ....                                                                           | 1 |
| <b>Table S2.</b> Data to substrate specificity of laccase KbLcc1 – reaction with ABTS.....                                                                                              | 2 |
| <b>Table S3.</b> Data to substrate specificity of laccase KbLcc1 – reaction with syringaldazine.....                                                                                    | 2 |
| <b>Table S4.</b> Data to substrate specificity of laccase KbLcc1 – reaction with guaiacol. ....                                                                                         | 3 |
| <b>Table S5.</b> Data to substrate specificity of laccase KbLcc1 – reaction with sinapic acid. ....                                                                                     | 3 |
| <b>Figure S1.</b> Influence of Cu <sup>2+</sup> ions supplementation of expressing medium BMMY on recombinant laccase activity after 7 d of cultivation of <i>Pichia pastoris</i> ..... | 3 |
| <b>Figure S2.</b> Stability of recombinant laccase KbLcc1 activity after 10 d of incubation in the presence of various metal ions. ....                                                 | 4 |
| <b>Figure S3.</b> GC-MS chromatograms of vanillin after 24 h biotransformation of ferulic acid by laccase KbLcc1.....                                                                   | 5 |
| <b>Figure S4.</b> GC-MS chromatograms of vanillin after 48 h biotransformation of ferulic acid by laccase KbLcc1.....                                                                   | 6 |
| <b>Figure S5.</b> GC-MS chromatograms of vanillin after 72 h biotransformation of ferulic acid by laccase KbLcc1.....                                                                   | 7 |
| <b>Figure S6.</b> GC-MS chromatograms of vanillin after 96 h biotransformation of ferulic acid by laccase KbLcc1.....                                                                   | 8 |
| <b>Figure S7.</b> GC-MS chromatograms of vanillin after 120 h biotransformation of ferulic acid by laccase KbLcc1.....                                                                  | 9 |

**Table S1.** Optimal temperature for laccase reaction with syringaldazine, guaiacol and sinapic acid.

| Temperature (°C) | Residual activity ± SD (%) |               |               |
|------------------|----------------------------|---------------|---------------|
|                  | Syringaldazine             | Guaiacol      | Sinapic acid  |
| 15               | 55.58 ± 0.79               | 61.55 ± 1.56  | 72.20 ± 0.90  |
| 20               | 63.22 ± 1.10               | 66.05 ± 1.56  | 85.77 ± 1.57  |
| 25               | 95.25 ± 1.53               | 86.51 ± 1.05  | 95.52 ± 0.92  |
| 30               | 100.00 ± 1.21              | 100.00 ± 1.07 | 100.00 ± 2.01 |
| 35               | 94.52 ± 1.22               | 93.22 ± 1.10  | 87.53 ± 0.96  |
| 40               | 88.31 ± 1.66               | 83.50 ± 1.51  | 75.03 ± 1.71  |
| 45               | 74.17 ± 0.99               | 63.09 ± 2.90  | 67.04 ± 1.68  |
| 50               | 54.47 ± 1.51               | 43.50 ± 1.54  | 47.97 ± 2.25  |

**Table S2.** Data to substrate specificity of laccase KbLcc1 – reaction with ABTS.

| Substrate concentration (mM) | Activity (U/mg) |       |       | Mean $\pm$ SD (U/mg) |
|------------------------------|-----------------|-------|-------|----------------------|
| 0.2                          | 8.71            | 8.70  | 8.42  | 8.61 $\pm$ 0.17      |
| 0.4                          | 15.41           | 14.27 | 15.29 | 14.99 $\pm$ 0.63     |
| 0.6                          | 17.79           | 17.45 | 17.08 | 17.44 $\pm$ 0.35     |
| 0.8                          | 19.84           | 19.34 | 19.09 | 19.43 $\pm$ 0.38     |
| 1.0                          | 22.19           | 21.72 | 20.76 | 21.56 $\pm$ 0.73     |
| 1.2                          | 22.19           | 23.47 | 23.75 | 23.13 $\pm$ 0.83     |
| 1.4                          | 23.90           | 23.77 | 24.97 | 24.21 $\pm$ 0.66     |
| 1.6                          | 24.19           | 23.95 | 24.66 | 24.27 $\pm$ 0.36     |
| 1.8                          | 24.97           | 25.29 | 25.73 | 25.33 $\pm$ 0.38     |
| 2.0                          | 25.72           | 26.45 | 27.13 | 26.37 $\pm$ 0.71     |
| 2.5                          | 27.54           | 27.20 | 27.86 | 27.53 $\pm$ 0.33     |
| 3.0                          | 28.14           | 29.44 | 29.07 | 28.88 $\pm$ 0.67     |
| 3.5                          | 30.73           | 29.45 | 28.76 | 29.58 $\pm$ 1.03     |
| 4.0                          | 29.13           | 29.59 | 30.21 | 29.64 $\pm$ 0.54     |

**Table S3.** Data to substrate specificity of laccase KbLcc1 – reaction with syringaldazine.

| Substrate concentration ( $\mu$ M) | Activity (U/mg) |       |       | Mean $\pm$ SD (U/mg) |
|------------------------------------|-----------------|-------|-------|----------------------|
| 5.5                                | 6.96            | 6.45  | 6.85  | 6.75 $\pm$ 0.27      |
| 6.0                                | 7.20            | 7.49  | 6.93  | 7.21 $\pm$ 0.28      |
| 6.5                                | 7.91            | 7.35  | 7.72  | 7.66 $\pm$ 0.29      |
| 7.0                                | 8.36            | 7.98  | 8.02  | 8.12 $\pm$ 0.21      |
| 7.5                                | 8.68            | 9.10  | 8.64  | 8.81 $\pm$ 0.26      |
| 8.0                                | 9.54            | 8.95  | 9.27  | 9.25 $\pm$ 0.30      |
| 8.5                                | 9.06            | 9.61  | 10.20 | 9.62 $\pm$ 0.56      |
| 9.0                                | 9.37            | 10.28 | 10.42 | 10.02 $\pm$ 0.57     |
| 10.0                               | 10.10           | 10.42 | 11.03 | 10.51 $\pm$ 0.47     |
| 15.0                               | 13.55           | 14.06 | 13.85 | 13.82 $\pm$ 0.25     |
| 20.0                               | 16.68           | 16.84 | 16.06 | 16.53 $\pm$ 0.41     |
| 25.0                               | 17.23           | 17.27 | 17.99 | 17.50 $\pm$ 0.43     |
| 30.0                               | 18.07           | 18.63 | 19.37 | 18.69 $\pm$ 0.65     |
| 35.0                               | 20.02           | 20.36 | 20.78 | 20.40 $\pm$ 0.36     |
| 40.0                               | 21.26           | 21.61 | 20.98 | 21.28 $\pm$ 0.32     |

**Table S4.** Data to substrate specificity of laccase KbLcc1 – reaction with guaiacol.

| Substrate concentration (mM) |      | Activity (U/mg) |      | Mean $\pm$ SD (U/mg) |
|------------------------------|------|-----------------|------|----------------------|
| 2.5                          | 0.75 | 0.71            | 0.69 | 0.72 $\pm$ 0.03      |
| 5.0                          | 1.37 | 1.42            | 1.36 | 1.38 $\pm$ 0.03      |
| 7.5                          | 1.76 | 1.82            | 1.75 | 1.78 $\pm$ 0.04      |
| 10.0                         | 2.12 | 2.13            | 2.07 | 2.11 $\pm$ 0.03      |
| 11.0                         | 2.11 | 2.09            | 2.13 | 2.11 $\pm$ 0.02      |
| 12.0                         | 2.19 | 2.20            | 2.17 | 2.19 $\pm$ 0.02      |
| 13.0                         | 2.25 | 2.26            | 2.24 | 2.25 $\pm$ 0.01      |
| 14.0                         | 2.37 | 2.42            | 2.33 | 2.37 $\pm$ 0.05      |
| 15.0                         | 2.41 | 2.38            | 2.43 | 2.41 $\pm$ 0.03      |
| 16.0                         | 2.1  | 2.51            | 2.57 | 2.53 $\pm$ 0.04      |
| 17.0                         | 2.51 | 2.58            | 2.53 | 2.54 $\pm$ 0.03      |
| 18.0                         | 2.67 | 2.70            | 2.64 | 2.67 $\pm$ 0.03      |
| 19.0                         | 2.68 | 2.70            | 2.65 | 2.68 $\pm$ 0.02      |
| 20.0                         | 2.62 | 2.67            | 2.71 | 2.67 $\pm$ 0.04      |

**Table S5.** Data to substrate specificity of laccase KbLcc1 – reaction with sinapic acid.

| Substrate concentration ( $\mu$ M) |      | Activity (U/mg) |      | Mean $\pm$ SD (U/mg) |
|------------------------------------|------|-----------------|------|----------------------|
| 3.0                                | 0.24 | 0.23            | 0.24 | 0.24 $\pm$ 0.01      |
| 6.0                                | 0.38 | 0.36            | 0.39 | 0.38 $\pm$ 0.01      |
| 12.0                               | 0.64 | 0.67            | 0.66 | 0.66 $\pm$ 0.01      |
| 24.0                               | 1.03 | 1.08            | 0.99 | 1.03 $\pm$ 0.04      |
| 56.0                               | 1.05 | 1.06            | 1.04 | 1.05 $\pm$ 0.01      |
| 100.0                              | 1.09 | 1.10            | 1.10 | 1.10 $\pm$ 0.00      |
| 110.0                              | 1.17 | 1.18            | 1.20 | 1.19 $\pm$ 0.01      |
| 120.0                              | 1.23 | 1.24            | 1.22 | 1.23 $\pm$ 0.01      |
| 150.0                              | 1.26 | 1.29            | 1.28 | 1.28 $\pm$ 0.02      |

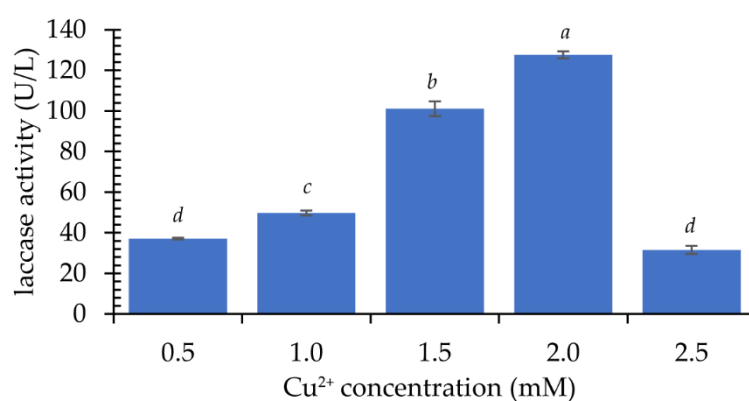**Figure S1.** Influence of Cu<sup>2+</sup> ions supplementation of expressing medium BMMY on recombinant laccase activity after 7 d of cultivation of *Pichia pastoris*.

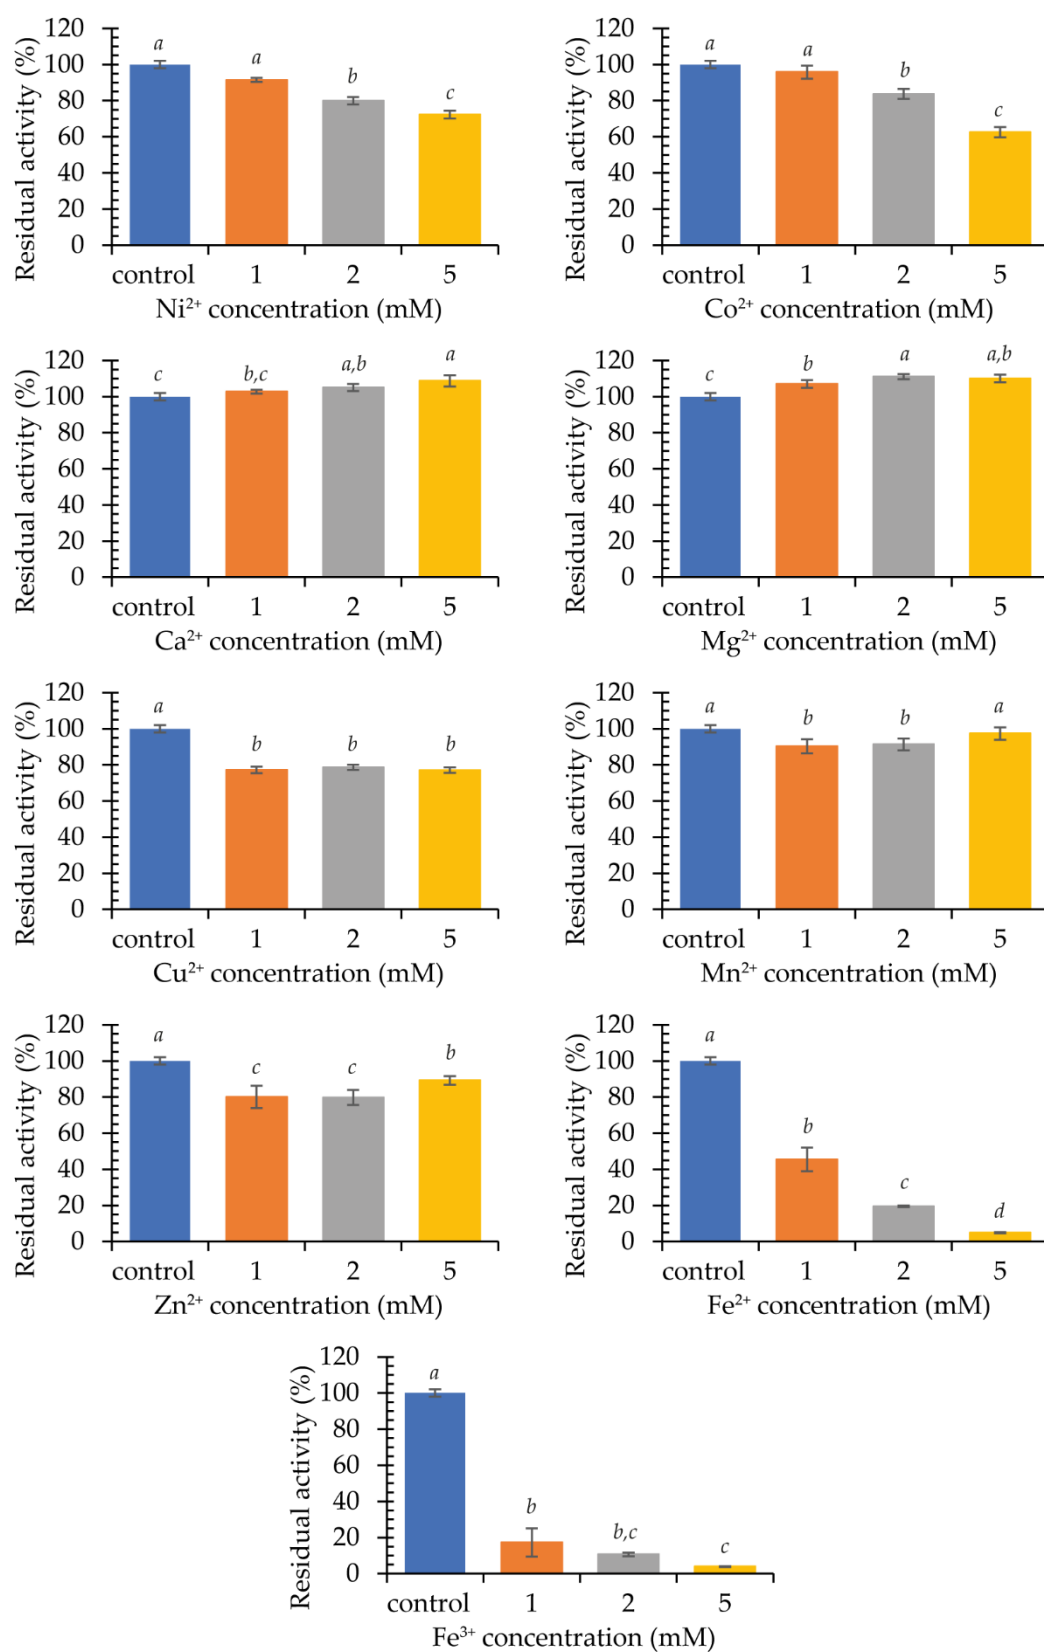

**Figure S2.** Stability of recombinant laccase KbLcc1 activity after 10 d of incubation in the presence of various metal ions.

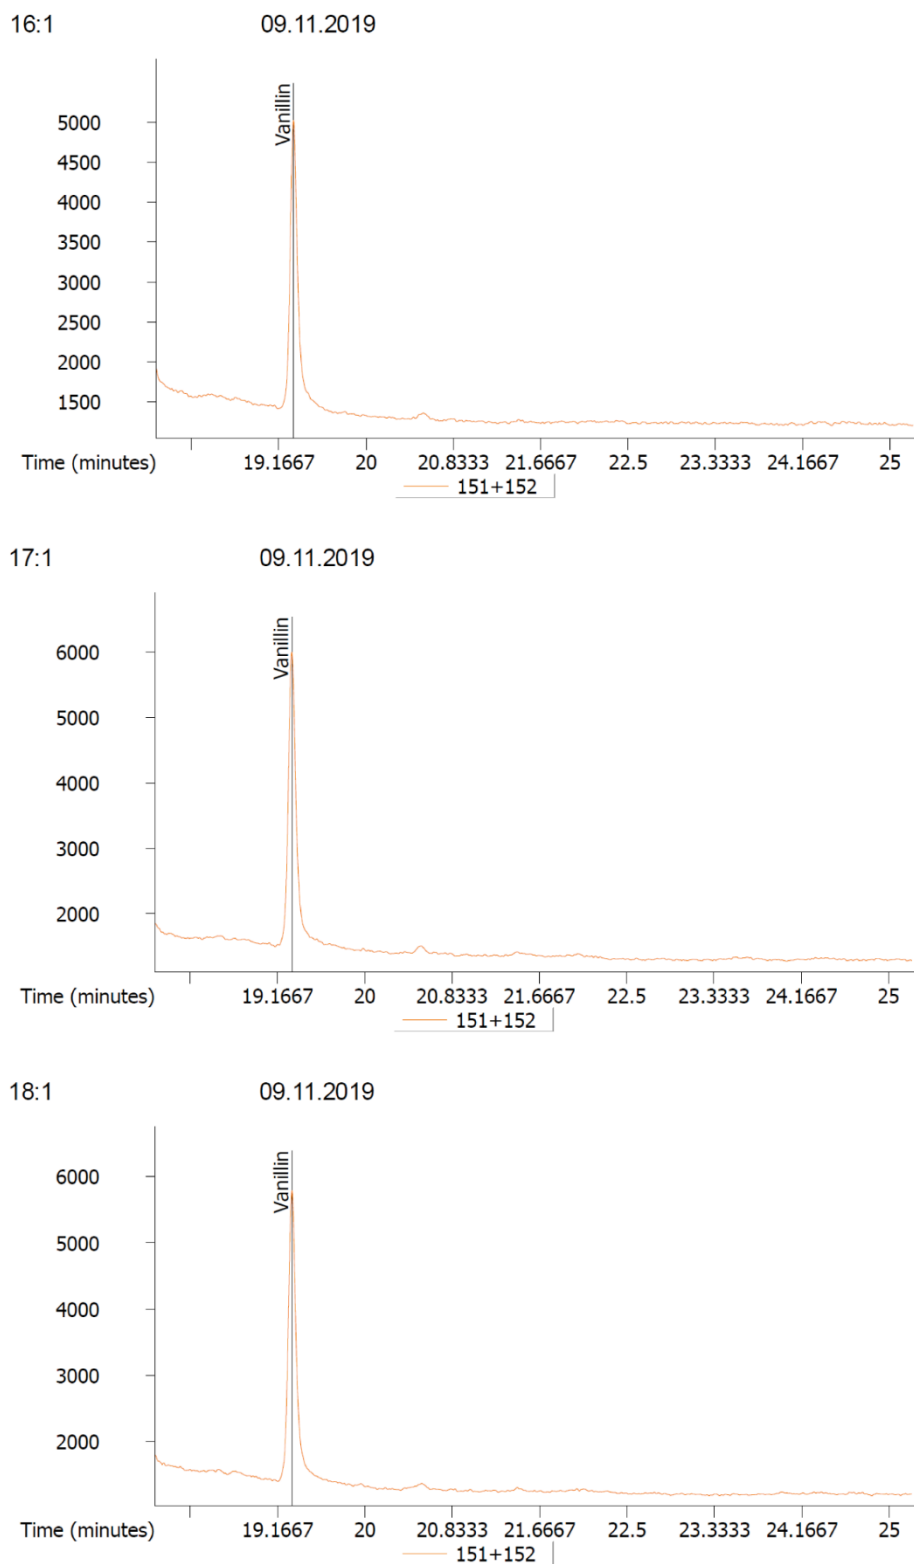

**Figure S3.** GC-MS chromatograms of vanillin after 24 h biotransformation of ferulic acid by laccase KbLcc1.

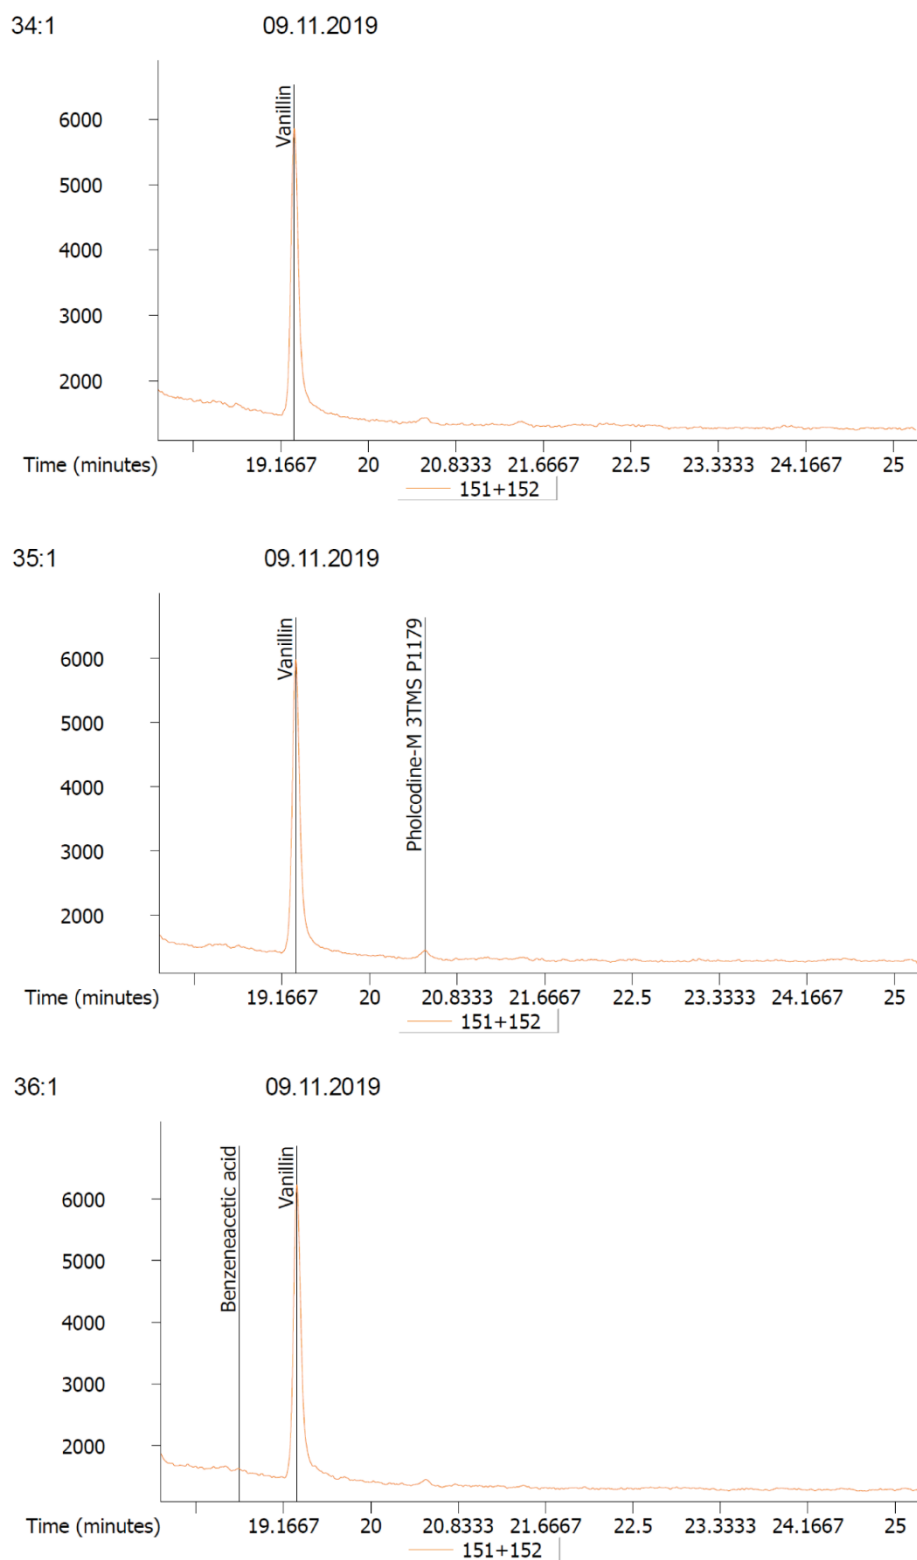

**Figure S4.** GC-MS chromatograms of vanillin after 48 h biotransformation of ferulic acid by laccase KblLcc1.

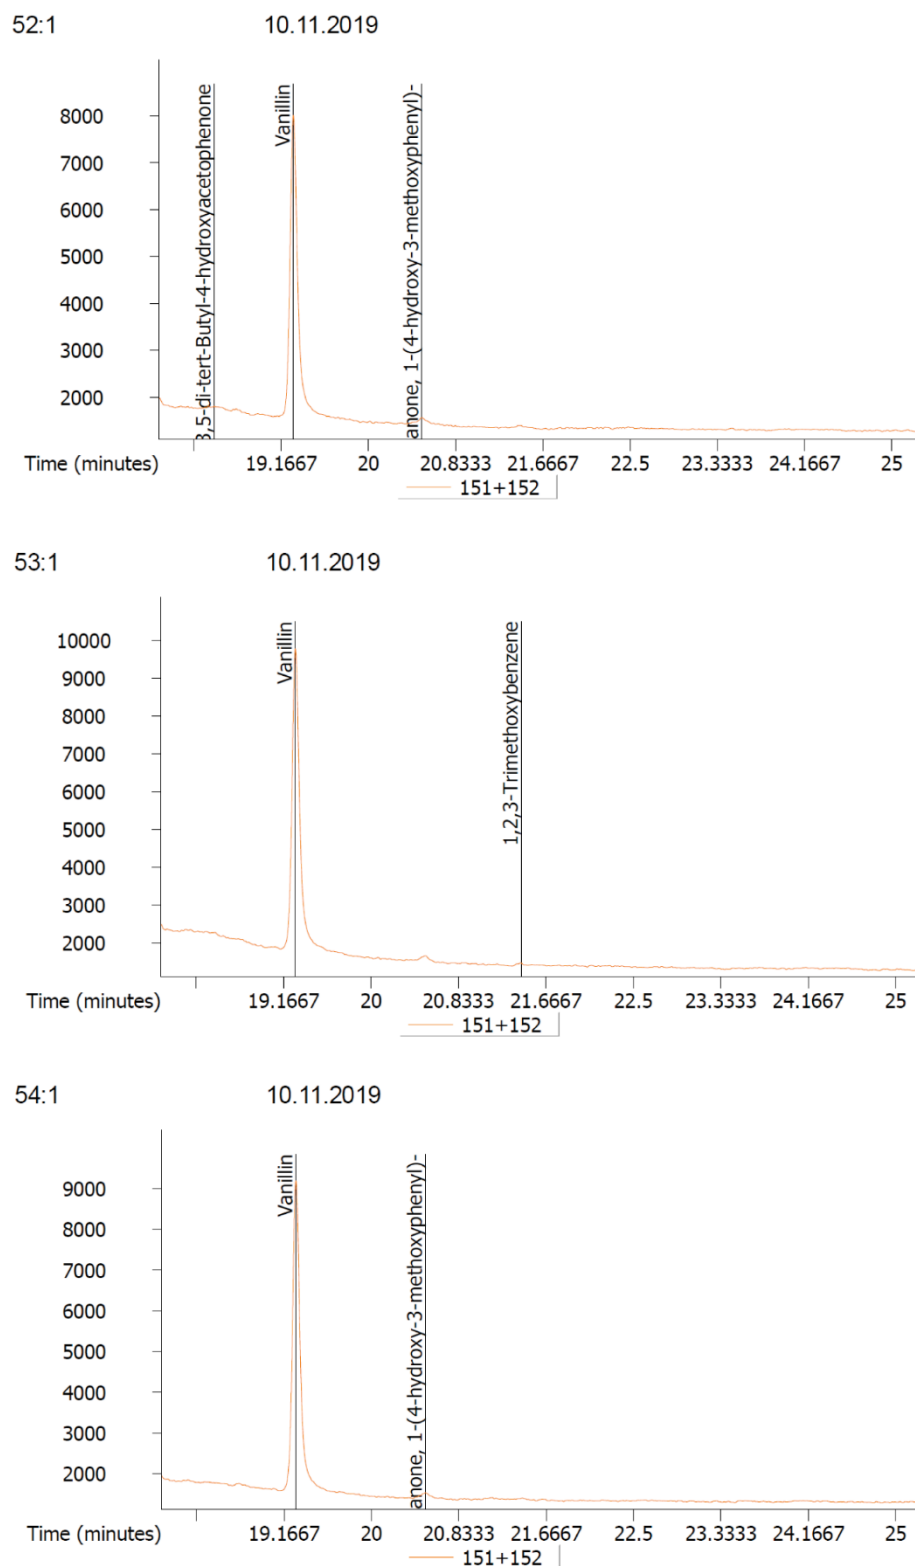

**Figure S5.** GC-MS chromatograms of vanillin after 72 h biotransformation of ferulic acid by laccase KbLcc1.

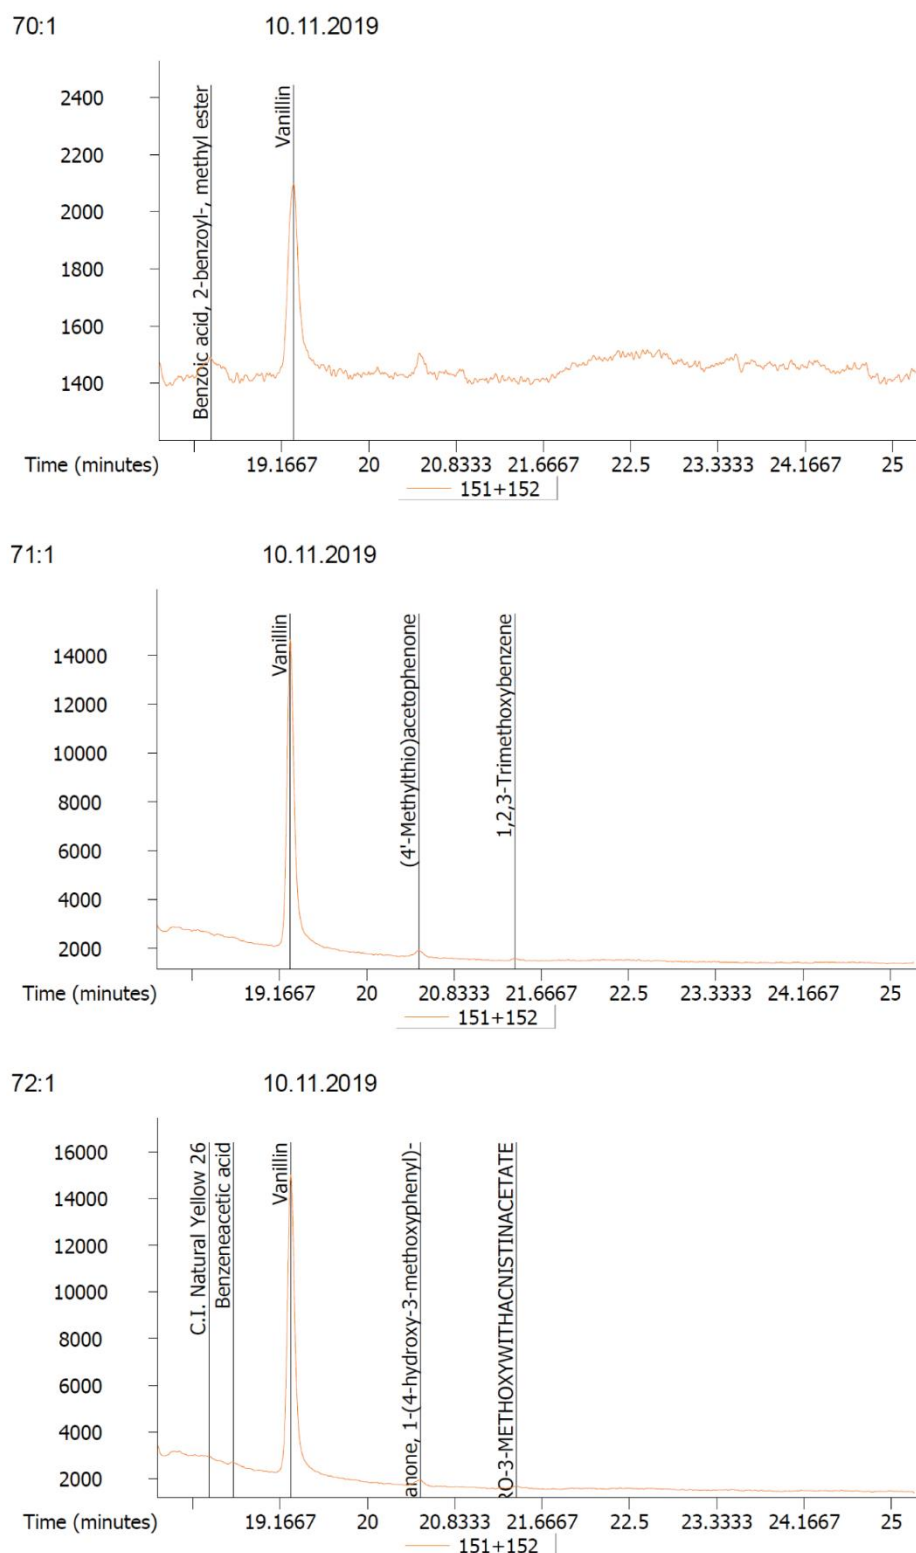

**Figure S6.** GC-MS chromatograms of vanillin after 96 h biotransformation of ferulic acid by laccase Kblcc1.



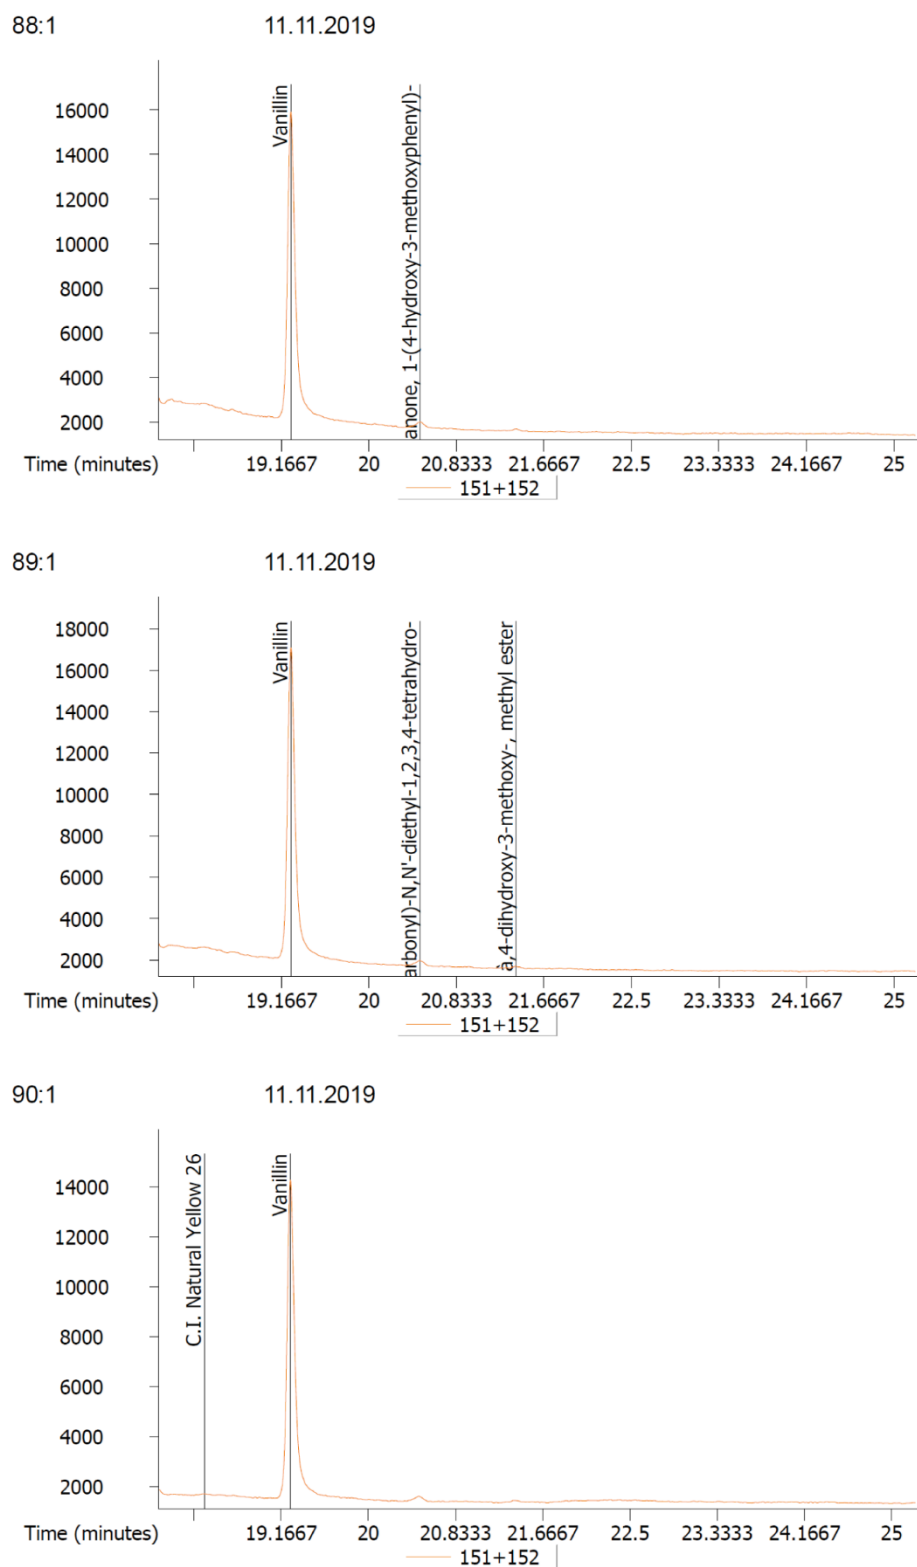

**Figure S7.** GC-MS chromatograms of vanillin after 120 h biotransformation of ferulic acid by laccase Kblcc1.
